# Supplementary material
Source: Royal Society of Chemistry journal article supplement (doi:10.1039/d6ta01622g)
Supplement: d6ta01622g1.pdf [file d6ta01622g1.pdf]

## Supporting information

### **Ordered VO<sub>2</sub> nanoflower with amorphous hybrid interfaces induced by Iodide ion doping for superior Zinc-ion storage**

Chaoxuan Wang<sup>1</sup>, Zeqi Liu<sup>1</sup>, Hao Wang<sup>1</sup>, Ying Sha<sup>1</sup>, Jianshu Wang<sup>1</sup>, Junhan Jia<sup>2</sup>, Yi  
Du<sup>2</sup>, Wuzhao Li<sup>2</sup>, Lei Qian<sup>1\*</sup>

*<sup>1</sup>School of Materials Science & Engineering, Shandong University, 17923 Jingshi  
Road, Jinan 250061, China*

*<sup>2</sup>Shandong Key Laboratory of Metamaterial and Electromagnetic Manipulation  
Technology, Shandong University, Jinan 250061, China.*

\*Corresponding author, Email address: qleric@sdu.edu.cn (Lei Qian).

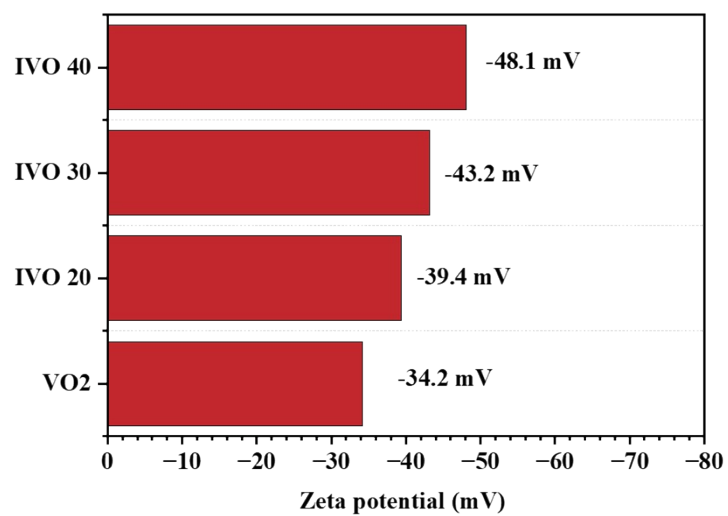

Fig. S1 Zeta potential test results

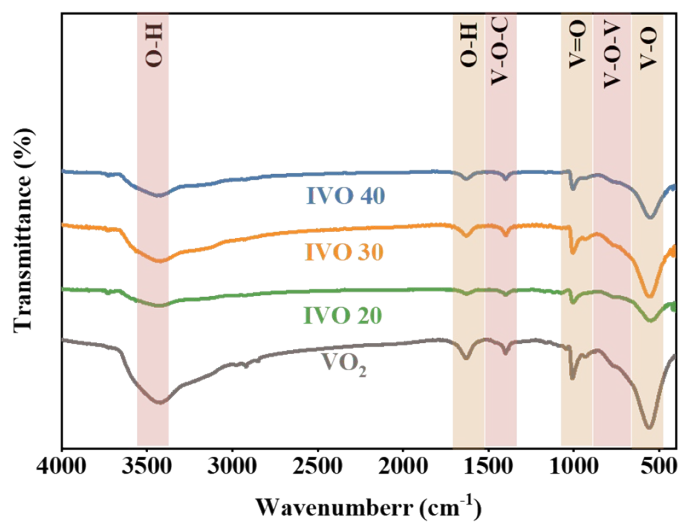

Fig. S2 FTIR spectra of VO<sub>2</sub>, IVO 10, IVO 20, IVO 30 and IVO 40

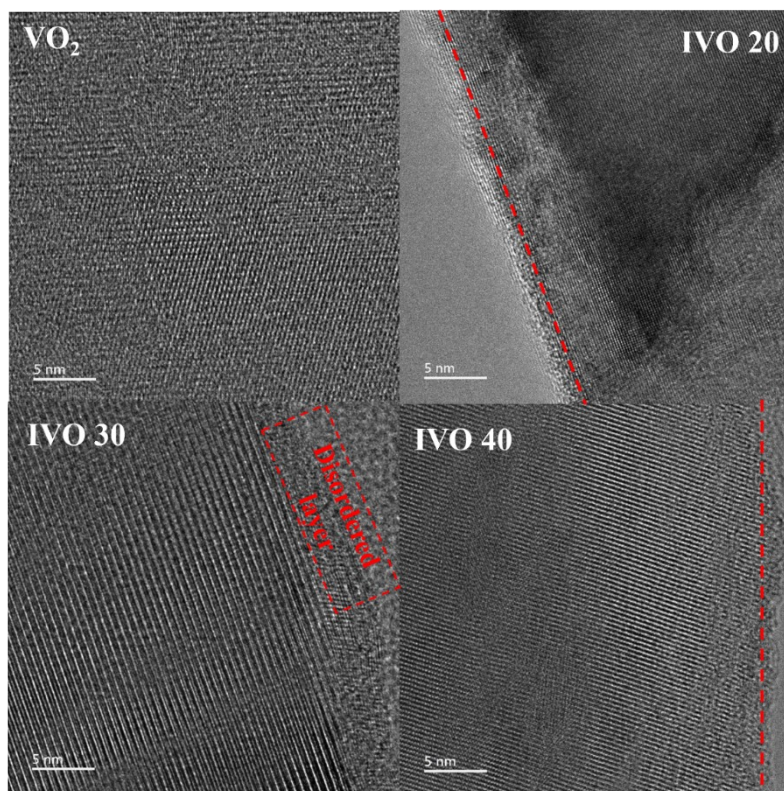

Fig. S3 Morphology and structural characterizations of IVO.

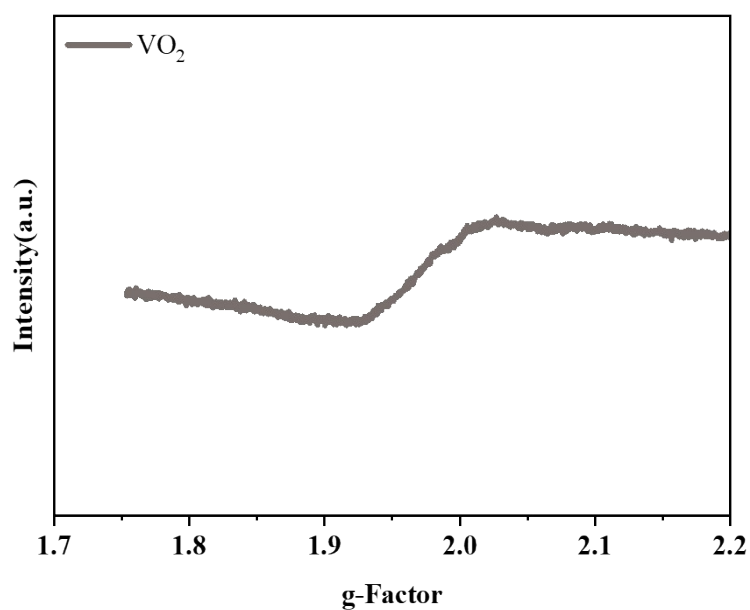

Fig. S4 EPR for VO<sub>2</sub>.

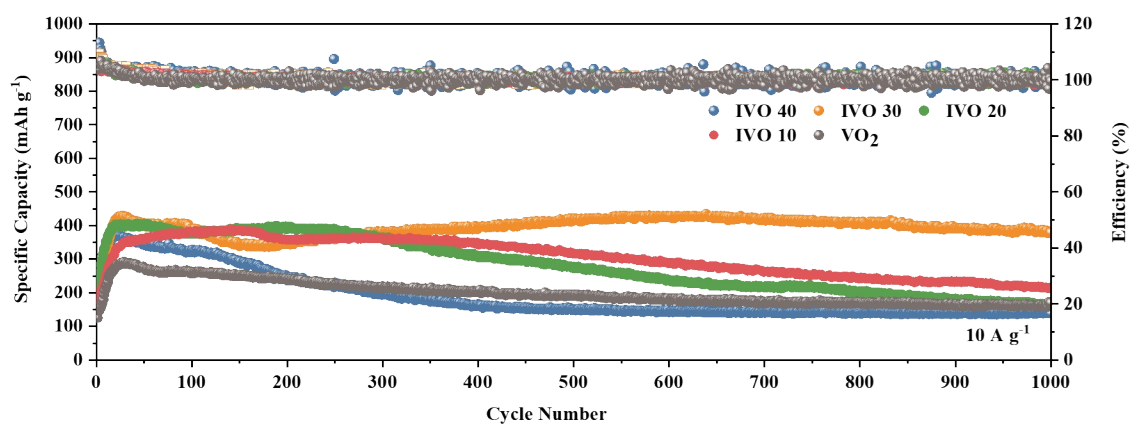

Fig. S5 Long-term cycle performance at 10 A g<sup>-1</sup> of VO<sub>2</sub>, IVO 10, IVO 20, IVO 30 and IVO 40.

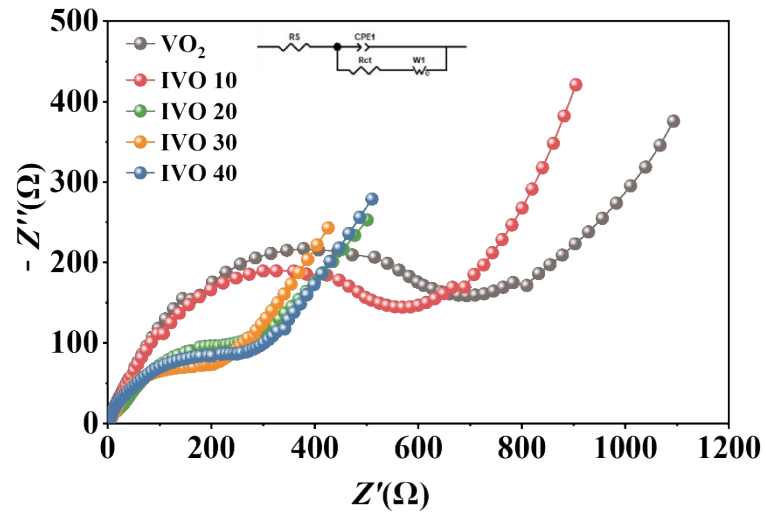

Fig. S6 EIS of VO<sub>2</sub>, IVO 10, IVO 20, IVO 30 and IVO 40.

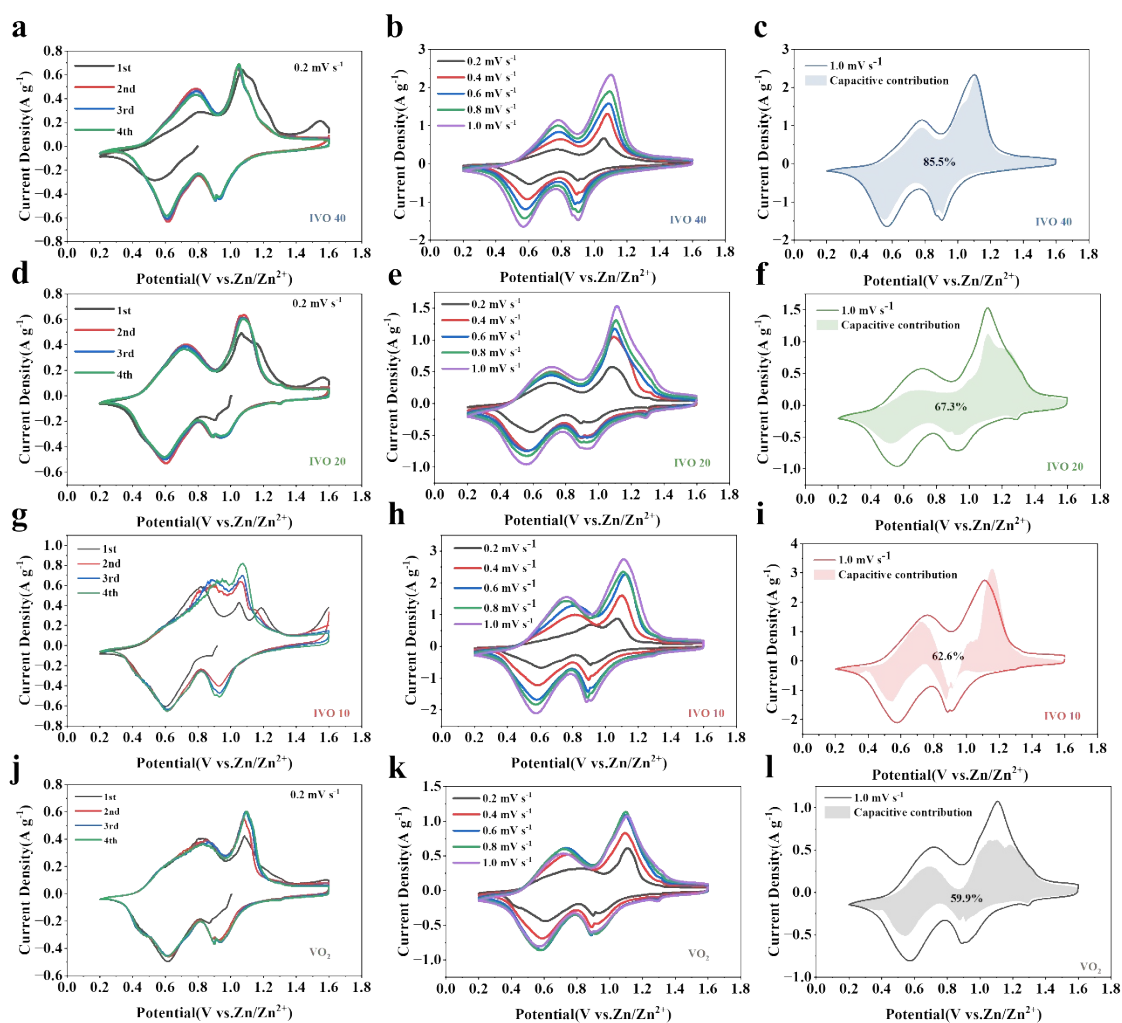

Fig. S7 (a) CV curves of IVO 40 in the first four cycles at  $0.2 \text{ mV s}^{-1}$ . (b) CV curves at various scan rates of IVO 40. (c) Capacitive contribution at  $1.0 \text{ mV s}^{-1}$  of IVO 40. (d) CV curves of IVO 20 in the first four cycles at  $0.2 \text{ mV s}^{-1}$ . (e) CV curves at various scan rates of IVO 20. (f) Capacitive contribution at  $1.0 \text{ mV s}^{-1}$  of IVO 20. (g) CV curves of IVO 10 in the first four cycles at  $0.2 \text{ mV s}^{-1}$ . (h) CV curves at various scan rates of IVO 10. (i) Capacitive contribution at  $1.0 \text{ mV s}^{-1}$  of IVO 10. (j) CV curves of  $\text{VO}_2$  in the first four cycles at  $0.2 \text{ mV s}^{-1}$ . (k) CV curves at various scan rates of  $\text{VO}_2$ . (l) Capacitive contribution at  $1.0 \text{ mV s}^{-1}$  of  $\text{VO}_2$ .

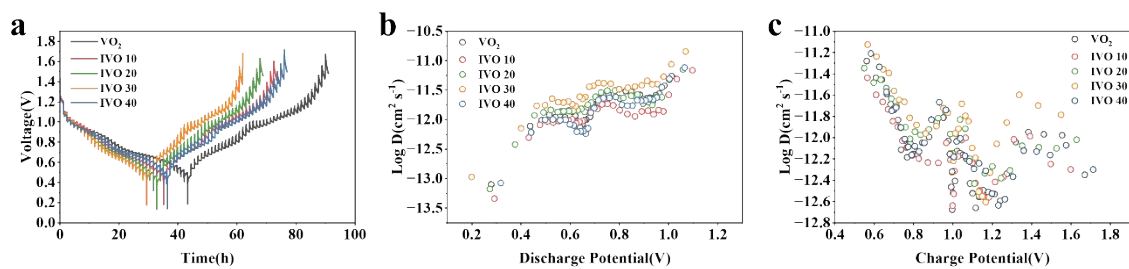

Fig. S8 (a) GITT curves of VO<sub>2</sub>, IVO 10, IVO 20, IVO 30 and IVO 40. (b-c) The corresponding diffusivity coefficient for Zn<sup>2+</sup> during the discharge and charge process.

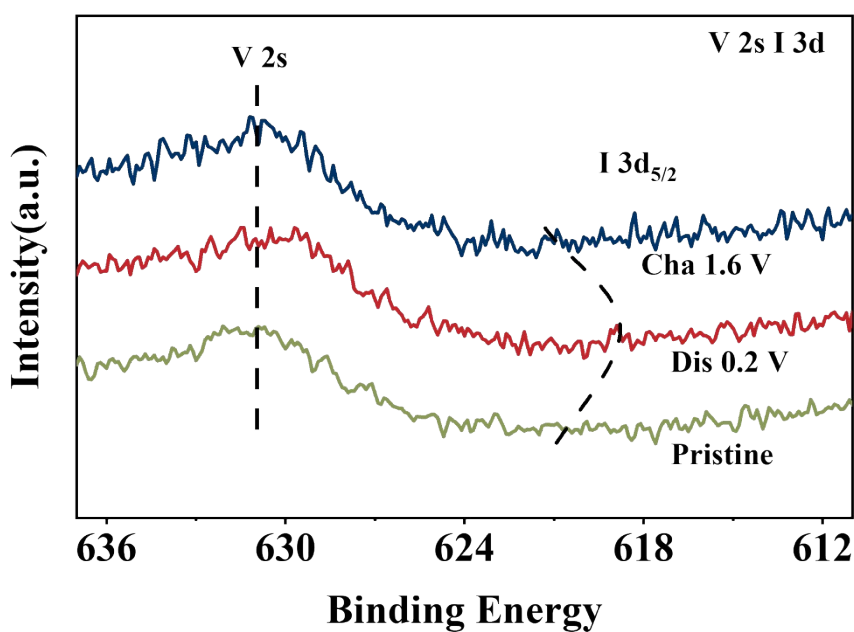

Fig. S9 XPS spectra of I elements in the first cycle
